# Supplementary material for: C/EBPα involvement in microglial polarization via HDAC1/STAT3 pathway aggravated sevoflurane-induced cognitive impairment in aged rats
Source: PeerJ. 2023 Jun 19;11:e15466. doi: 10.7717/peerj.15466 (PMC10286799; doi:10.7717/peerj.15466)
Supplement: Supplemental Information 1 [file peerj-11-15466-s001.xlsx]

## Sheet: Sheet1
					Control			Sevo
		Relative C/EBPα expression			Mean			Mean
					0.92			3.12
					0.96			3.08
					1.03			3.31
					1.03			3.08
					0.97			2.85
					0.8			3.14
					1.02			3.36
					1.16			3.28
					1.05			3.43
					0.96			2.88
					1.02			3.03
					0.81			3.07
					0.93			3.13
					0.94			3.47
					0.96			3.09
					1.03			3.23
					1.11			2.62
					1.02			2.85
					1.1			2.88
					0.85			3.21
					Control			Sevo			Sevo+sh-NC			Sevo+sh-C/EBP
		Relative C/EBPα expression			Mean			Mean			Mean			Mean
					0.91			3.09			3.25			1.14
					1.06			3.29			3.09			1.16
					1.06			3.52			3.24			1.3
					1.04			2.93			3.05			1.14
					1			2.74			3.15			1.14
					0.91			3.11			3.06			1.06
					0.88			2.83			2.98			1.03
					0.96			3.2			2.69			1.03
					1.14			2.81			3.45			1.16
					1.12			3.15			3.22			1.28
					1.06			2.8			2.95			1.15
					1.07			3.34			2.91			1.24
					0.83			3.09			2.93			1.2
					0.97			3.18			3.29			1.26
					0.97			3.5			2.86			1.1
					0.9			3.03			2.66			1.03
					1.06			3.23			3.09			1.29
					1.14			3.25			2.96			1.18
					0.86			3.28			3.02			1.12
					1			2.92			3.05			1.25
		Relative CD86 mRNA expression			1.09			4.85			4.94			1.5
					0.99			4.8			4.87			1.86
					0.84			5.09			5.01			1.47
					1.1			4.23			4.95			1.47
					0.92			4.2			4.71			1.24
					1.12			5.26			4.12			1.38
					0.91			5.01			5.32			1.64
					1.07			4.92			5.06			1.39
					0.76			4.42			4.74			1.43
					1.03			4.71			4.11			1.73
					1.07			4.95			5			1.17
					1.02			4.51			4.7			2.01
					0.77			4.47			4.75			1.42
					1.06			4.5			4.85			1.7
					1.31			4.82			4.35			1.66
					0.93			4.39			4.84			2.21
					1.19			4.57			4.94			1.62
					1.04			5.03			5.67			1.22
					1.1			4.66			5.13			1.77
					1.26			4.9			5.03			1.41
		Relative CD206 mRNA expression			0.95	0.099	20	0.3	0.032	20	0.18	0.045	20	0.91	0.068	20
					1.08			0.28			0.35			0.92
					1.05			0.31			0.29			0.87
					1			0.34			0.24			0.84
					1.08			0.36			0.28			0.86
					1.1			0.33			0.3			0.89
					1.13			0.28			0.25			0.91
					1.03			0.35			0.3			0.81
					1.06			0.33			0.31			1
					1.05			0.31			0.34			0.95
					0.87			0.22			0.29			1.04
					1.14			0.3			0.28			0.84
					1.08			0.3			0.32			0.87
					1.05			0.36			0.18			1.01
					0.77			0.32			0.31			1.01
					1.04			0.32			0.27			0.88
					1.03			0.31			0.29			0.95
					0.87			0.3			0.32			0.81
					0.87			0.3			0.31			0.87
					1.05			0.34			0.29			0.87

## Sheet: Sheet3
						vector			C/EBP			sh-NC			sh-C/EBP
			Relative HDAC1 expression			Mean			Mean			Mean			Mean
						1.06			2.76			1.14			0.39
						0.98			2.75			0.95			0.45
						0.98			3.21			0.9			0.53
						1.07			3.04			0.81			0.4
						1.16			2.57			0.93			0.28
						1			2.88			0.87			0.33
						1.28			3.33			0.93			0.5
						1.08			2.88			0.9			0.35
						1.03			2.99			1.04			0.56
						1.09			2.67			1.13			0.45
						1.1			2.51			0.87			0.69
						0.91			2.75			1.23			0.39
						1.07			2.59			1.01			0.45
						0.95			2.86			1.03			0.36
						1			3.08			1.12			0.37
						1.16			2.99			1.03			0.2
						1.13			2.76			1.09			0.18
						0.78			2.99			1.03			0.69
						1.1			2.43			1.11			0.92
						1.01			2.65			0.85			0.55
						Control			Sevo			Sevo+sh-NC			Sevo+sh-C/EBP
			Relative HDAC1 expression			0.83			3.37			3.2			1.3
						0.83			3.19			3.17			0.85
						1.12			3.05			3.67			1.1
						1.06			3.41			2.98			1.41
						1.08			3.44			3.38			1.05
						1.04			3.17			3.36			1.07
						0.76			3.73			3.35			0.98
						0.99			3.65			3.67			1
						0.95			3.01			3.5			0.83
						1			3.05			3.16			1.16
						0.94			3.48			3.35			1.15
						1.1			3.36			3.8			1.01
						0.9			2.92			3.07			1.19
						0.94			3.57			3.22			1.11
						1.04			3.6			3.56			1.19
						0.8			3.37			3.41			1.39
						1.25			3.61			3.43			1.11
						1			2.98			3.55			0.98
						1.11			3.16			2.91			0.96
						0.88			2.99			3.35			1.05
			Relative p-STAT3/STAT3 expression			0.9			3.55			3.64			0.91
						1.12			3.91			3.22			1.06
						0.88			3.75			3.01			1.08
						1.12			3.24			3.65			1.13
						1.23			3.27			4.06			1.27
						1.07			3.49			3.03			1.29
						0.94			3.92			3.77			1.29
						0.88			3.62			3.68			1.19
						1.08			3.84			3.7			1.16
						0.96			3.71			3.87			1.68
						0.96			3.43			3.79			1.47
						1.14			3.64			3.86			1.57
						1.07			3.89			3.79			1.31
						1.09			3.54			3.14			1.5
						1.09			3.43			3.77			1.24
						0.96			3.94			3.66			1.14
						0.96			3.8			3.31			1.33
						1.04			3.32			3.61			0.88
						0.95			3.41			3.57			0.89
						0.99			3.65			3.77			1.51
			IL-6 level			86.09			176.96			151.55			109.6
						62.72			160.02			109.37			66.46
						91.99			157.33			156.57			94.57
						55.06			120.95			142.46			75.6
						55.91			133.85			123.54			78.97
						51.63			127.36			152.06			95.56
						78.73			143.9			148			77.7
						79.9			159.48			149.2			68.26
						95.24			183.03			160.3			82.93
						92.19			153.42			134.81			111.82
						79.34			154.13			161.43			68.37
						83.26			156.26			146.74			76.91
						83.91			153.79			187.43			68.34
						60.28			113.55			149.86			83.07
						82.86			153.11			123.83			102.71
						55.46			137.19			149.12			83.22
						85.84			165.29			172.56			113.58
						83.56			154.65			188.83			111
						86.45			151.97			185.69			75.38
						59.57			133.76			176.66			105.95
			TNF-α level			71.54			216.61			220.13			124
						102.67			196.83			176.15			98.29
						92			238.32			157.57			124
						104.76			199.84			190.02			124
						91			166.73			238.15			107.29
						92			242			177.21			115.88
						128.44			198.67			240.79			118.21
						106.2			180.52			179.82			104.12
						71.27			167.9			199.89			124
						91.83			244.49			202.64			124
						103.19			243.6			232.62			141.42
						97.11			215.32			218.32			124
						92			216.04			184.58			121.19
						72.39			184.94			208.72			124
						65.32			208.5			222.95			127.33
						99.9			218.54			165.26			124
						108.54			243.14			175.98			121.03
						75.72			161.2			186.1			163.33
						97.75			184.88			183.03			169.47
						86.37			181.92			190.07			90.44
			IL-10 level			39.28			12.95			15.58			42.65
						37.98			7.46			15.03			36.67
						40.14			20.4			12.07			48.2
						39.63			14.51			16			36.61
						47.3			17.73			21.42			35.49
						34.86			12.32			19.25			46.64
						38.66			8.65			9.4			44.09
						39.83			22.27			12.77			44.88
						41.15			21.73			13.16			38.88
						49.36			16.75			11.94			33.51
						46.22			16.79			12.76			42.99
						31.82			10.16			24.81			38.88
						44.98			17.25			18.34			37.39
						41.16			22.46			12.55			39.65
						49.27			14.58			15.35			39.18
						47.24			11.88			18.79			42.24
						43.73			15.05			9.41			50.16
						48.57			15			15.56			42.69
						50.62			17.05			18.84			35.59
						38.21			15			16.98			37.68
			TNF-β level			58.19			19.16			10.75			57.28
						52.51			26.12			14.43			64.28
						58.6			20.89			24.11			57.94
						56.65			25.77			17.66			53.73
						59.2			23.63			24.19			58.24
						50.63			16.57			30.38			56.81
						48.05			17.83			26.9			61.12
						56.56			21.58			24.7			64.84
						56.73			19.75			31.1			56.86
						60.72			15.51			29.43			60.99
						53.66			21.66			15.1			59.26
						52.11			16.39			16.75			58.37
						50.57			23.84			22.12			57.73
						54.31			16.19			26.03			53.62
						49.95			23.85			17.11			62.57
						49.8			20.52			24.65			52.77
						63.24			18.58			25.34			55.2
						51.37			22.33			22.2			61.89
						57.38			22.51			27.42			62.15
						56.69			17.33			22.21			59.17

## Sheet: Sheet4
						Control			Sevo			Sevo+sh-NC			Sevo+sh-C/EBP
			Freezing time to context (%)			61.4			24.53			22.75			57.92
						57.31			29.97			24.96			55.42
						61.05			24.88			33.51			53.71
						62.29			28.22			27.09			51.05
						58.85			16.89			25.41			55.77
						58.89			27.41			33.91			52.48
						65.41			26.08			22.19			62.45
						69.24			38.32			31.71			53.02
						63.31			29.41			33.64			55.45
						61.59			21.99			32.51			57.13
						64.63			31.23			33.93			57.34
						58.89			30.33			32.42			59.7
						58.28			25.41			23.31			58.04
						65.8			26.71			28.18			60.2
						63.78			29.76			29			56.24
						60.81			31.8			32.17			59.29
						65.03			24.44			32.82			59.97
						65.39			27.81			29			58.41
						60.98			33			29			55.42
						67.07			21.8			28.33			50.98
			Freezing time to tone (%)			42.39			25.31			40.59			44.61
						35.52			37.73			34.99			38.5
						42.59			38.24			43.17			40
						43.44			31.71			37			41.21
						47.9			42.31			37			45.54
						37.14			37.05			34.76			38.83
						38.1			42.18			39.85			40.59
						47.37			37.74			39.92			37.13
						41.94			36.96			34.75			40
						42.73			38.07			42.16			39.19
						45.08			38.62			38.58			34.02
						42.1			40.05			34.31			37.14
						43.61			32.1			32.45			38.99
						39.1			39.97			29.56			36.48
						42.36			37.37			37			43.43
						48.95			28.77			41.23			38.8
						42.5			33.29			30.72			34.14
						42			36.67			34.61			41.88
						42			42.77			37			44.15
						43.18			33.09			30.35			43
			platform crossing times			6.28			4.43			4.23			6.94
						6.74			3.92			2.65			6.32
						5.65			4.42			4.16			6.25
						6.42			3.7			3.31			5.37
						7.05			3.72			3.77			5.35
						5.86			3.41			3.39			5.45
						6.28			4.38			4.51			6.23
						6.28			5.47			3.85			6.23
						6			3.61			3.87			6.35
						5.54			4.98			4.3			5.63
						5.76			4.49			3.71			6.6
						6.4			3.91			4.6			5.61
						7.12			3.57			4.08			5.32
						6.95			4.56			3.76			5.22
						6.59			5.24			4.18			6.01
						6.29			3.54			4.29			5.31
						6.82			3.43			4.52			5.7
						7.09			4.18			3.71			5.73
						7.08			4.51			3.62			6.65
						7.18			3.53			4.59			6.72
						68.71			74.31			63.78			72.62
			Escape latency (s)		1	65.04			73.84			79.99			69.71
						64.37			94.57			88.22			69.05
						75.35			73.91			70.89			83.53
						76.08			70.45			68.3			79.03
						62.66			85.42			67.38			70.35
						78.99			74.25			64.54			69.22
						67.29			61.44			79			81.22
						67.53			74.06			73.38			85.51
						77.44			86.88			82.73			70.42
						75.25			73.47			72.67			67.11
						71.45			75.22			81.9			75.56
						76.86			89.44			83.93			77.41
						63.3			89.15			73.61			73.79
						60.04			73.75			71.99			74.39
						66.87			86.58			72.9			83.85
						76.58			75.59			81.42			81
						83.73			76.03			81.28			70.03
						75.33			82.82			72.01			77.9
						71			75.11			80.08			78.29
					2	32.57			62.46			62.34			52.46
						54.73			70.75			70.47			60.06
						48.06			64.14			58.6			57.47
						50.63			70.62			71			50.22
						48.02			72.55			80.36			53.75
						49.26			64.57			70.69			57.89
						46			70.88			67.84			49.69
						54.75			73.2			70.31			58.08
						43.62			73.33			74.52			54.34
						55.7			62.1			67.36			46.7
						45.56			69.29			80.73			49.49
						49.08			69.65			75.22			57.63
						52.75			64.97			64.8			48.83
						34.34			67.67			75.16			52.46
						28.88			65.57			75.81			49.59
						50.14			75.15			71			56.33
						41.77			67.89			76.24			55.04
						45.99			73.21			71			53.55
						45.22			67.71			64.86			60.47
						48.66			70.39			81.68			45.95
					3	38.16			61.22			50.69			52.25
						28.36			58.78			52.62			52.87
						38.02			60.44			65.8			47.46
						30.71			54.44			62.14			44.02
						25.94			63.73			63.7			46.13
						27.54			63.87			51.76			64.42
						38.49			55.12			56.1			42.98
						38.87			58.52			54.36			38.93
						44.08			55.73			65.36			51.23
						39.38			52.06			53.36			52.47
						43.16			57.61			65.95			39.17
						38.41			48.22			61.51			43.52
						32.42			60.69			61.11			40.49
						43.89			58.38			47.82			51.22
						32.64			59.69			62.41			38.4
						31.02			51.75			63.03			43.12
						40.74			53.16			51.4			43.39
						31.62			56.12			62.48			44.4
						39.25			61.71			61.3			46.96
						27.29			58.75			57.1			46.15
					4	18.02			45.47			60.65			36.68
						18.69			54.43			55.61			44.17
						27.83			56.1			53.08			36.94
						16.74			55.93			58.5			31.66
						18.14			60.68			42.34			40.48
						25.78			50.28			61.13			47.74
						13.78			48.93			65.99			44.18
						30.16			60.33			52.46			37.45
						15.73			50.14			48.6			43.07
						29.55			47.68			55			36.81
						29.74			55.51			60.15			41.93
						27.09			51.15			55			30.04
						27			56.95			50.6			43.07
						25.07			43.86			56.4			30.89
						26.25			41.69			57.46			41.07
						20.8			52.36			58.02			37.72
						26.47			41.25			54.93			32.93
						15.96			47.49			54.45			43.57
						17.6			54.53			56.89			35.11
						19.61			49.52			32.75			34.5
			Swimming Speed		1	25.49			25.53			22.7			25.54
						26.06			21.35			26.81			23.84
						26.58			21.4			22.87			22.8
						22.45			23.36			23.27			21.31
						23.97			23.15			22.7			22.62
						24.37			18.58			22.61			24.69
						27.68			22.98			19.06			25.4
						25.31			22.99			20.83			22.54
						25.07			20.76			23.34			21.84
						24.13			23.32			23.86			23.64
						23.22			21.36			18.8			24.26
						22.08			21.84			20.06			22.96
						26.76			21.44			22.79			26.79
						23.64			21.83			19.01			21.67
						26.18			21.9			25.32			22.85
						23.22			24.16			22.71			20.54
						25.68			23.27			22.48			27.6
						23.44			21.36			25.84			22.77
						22.1			24.04			23.06			23.23
						25.56			21.08			24.88			22.1
					2	21.93			21.91			22.5			22.54
						21.35			19.6			22.71			19.32
						25.03			22.09			22.28			23.24
						23.76			23.43			23.85			17.84
						23.76			19.89			22.01			21.11
						25.28			25.01			23.75			26.39
						22.09			19.08			23.02			21.49
						23.76			23.54			21.25			26.47
						23.76			22.54			22.5			25.14
						25.63			17.36			24.73			20.9
						22.89			23.29			22.38			21.82
						23.76			22.45			27.06			21.08
						23.27			23.28			22.5			23.09
						23.76			20.39			23.68			21.12
						26.33			24.16			20.04			22.22
						22.89			24.28			22.41			23.95
						24.6			23.12			22.4			21.73
						23.76			23.29			20.74			23.49
						23.92			21.79			18.2			21.96
						23.76			18.59			21			22.19
					3	21.31			22.33			19.48			22.64
						22.58			25.99			23.05			20.99
						22.37			21.02			19.74			22.83
						23.83			23.7			19.31			19.32
						24.08			20.94			22.72			21.48
						22.8			23.58			20.41			20.7
						24.99			22.17			22.09			19.77
						22.8			23.63			21.69			24.03
						22.05			22.89			19.76			21.16
						23.02			22.18			23.11			22.9
						21.79			22.39			20.2			25.78
						23.02			26.62			19.98			22.84
						18.04			22.22			22.25			21.53
						23.29			23.94			23.01			20.76
						24.83			26.2			19.26			20.67
						22.76			19.18			22.08			19.8
						21.7			19.54			20.58			20.96
						22.74			23.68			22.01			23.57
						21.69			23.12			22.79			23.71
						26.28			22.39			19.47			21.57
					4	23.44			23.92			23.72			21.83
						21.78			20.93			21.5			22.76
						24.89			21.75			16.82			18.89
						19.84			22.51			20.16			20.94
						20.25			23.41			18.68			21.88
						23.25			23.94			24.14			21.7
						24.36			21.71			20.22			20.47
						21.44			23.1			21.33			21.03
						23.44			22.14			22.6			22.89
						21.16			24.06			18.7			20.35
						21.22			21.89			19.64			20.29
						20.95			19.52			20.63			20.73
						21.35			21.51			20.01			22.75
						26.04			16.01			17.54			23.57
						22.01			24.29			24.06			21.88
						23.03			23.55			17.17			18.27
						20.64			20.72			21.83			19.53
						20.5			20.6			22.58			22.16
						23.45			20.25			20.38			22.19
						25.86			20.7			21.29			20.9

## Sheet: Sheet2
							Input			IgG			Anti-C/EBP
				Fold enrichment of HDAC1			Mean			Mean			Mean
							1			0.02			0.73
							1.13			0.06			0.77
							1.07			0.09			0.66
							0.95			0			0.68
							1.14			0.07			0.54
									-1848	-1643	-1592	-1581
									1.45	1.09	0.87	1.06
									1.1	0.78	1.37	1.08
							pEX3-vector		1.1	1.07	1.27	1.26
				Relative luciferase activity					0.72	1.15	0.93	0.96
									0.91	0.73	1.18	0.97
									8.43	6.8	1.53	1.17
									7.8	6.06	1.8	0.94
							pEX3-vector		7.82	7.06	1.39	0.85
									8.58	6.79	1.79	1.18
									7.54	6.71	1.56	0.89
